# Supplementary material for: Effects of photophase illuminance on locomotor activity, urine production and urinary 6-sulfatoxymelatonin in nocturnal and diurnal South African rodents
Source: Oxford University Press journal article supplement (doi:10.1242/jeb.146951), 2017-01-01
Supplement: jeb146951supp.pdf [file jeb146951supp.pdf]

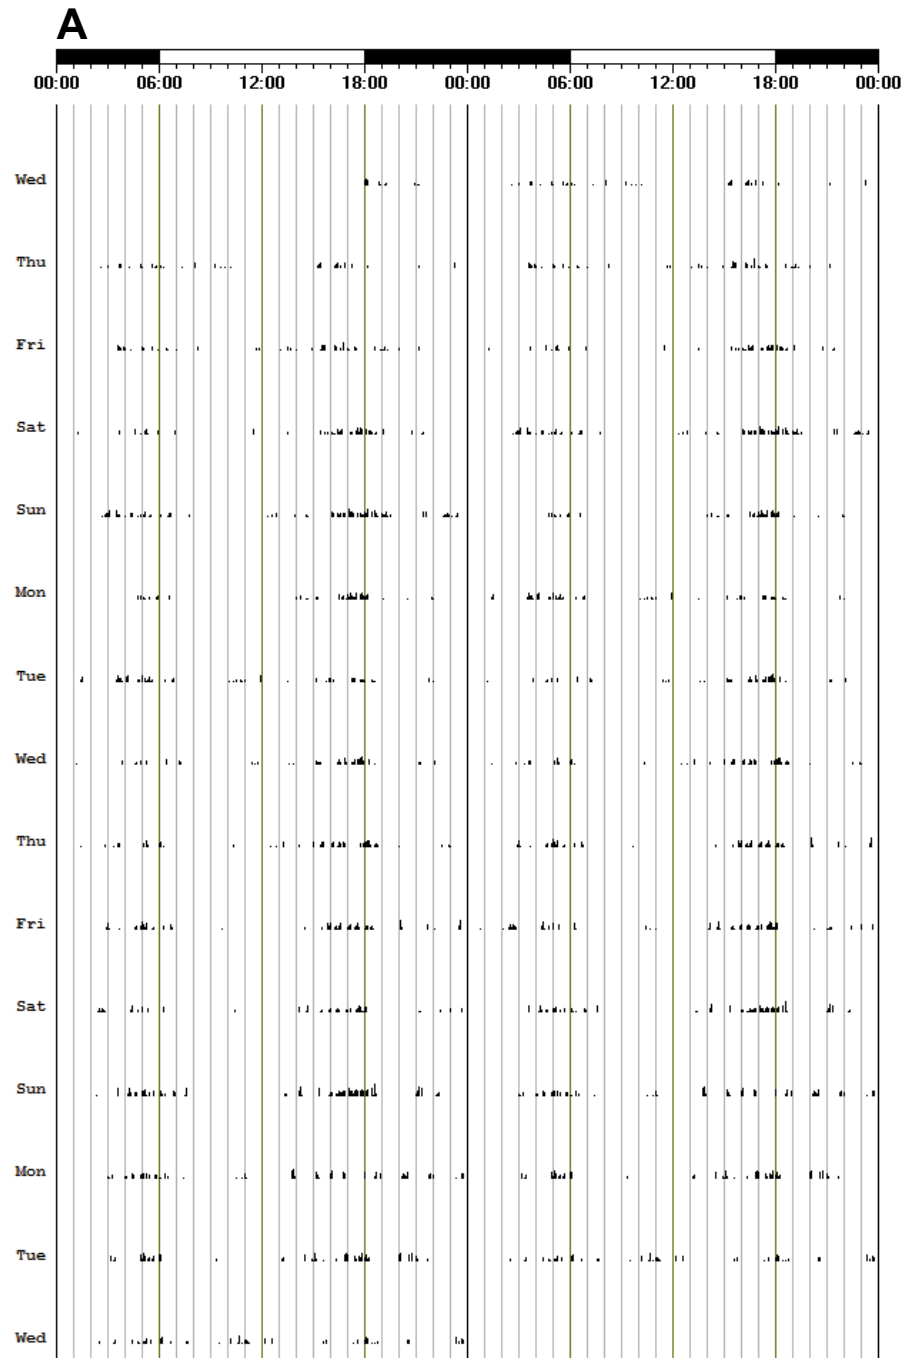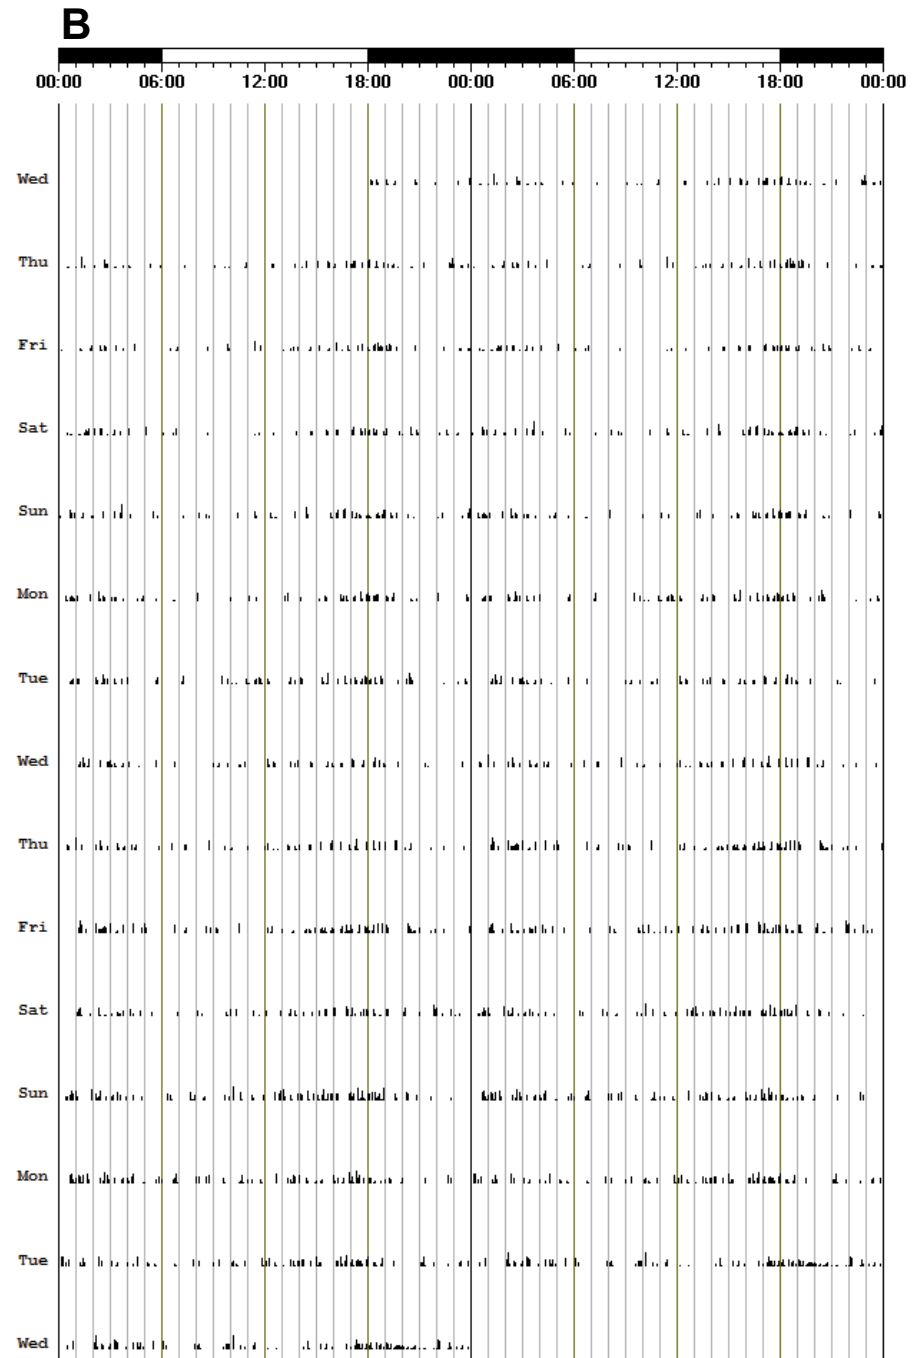

**Fig. S1. Representative actograms for *Rhabdomys pumilio*.** The present actograms were recorded under the 1 lx ILC; in mouse number 2 (A), activity was concentrated around dusk and dawn whereas in mouse number 7 (B), activity was expressed intermittently throughout the day but with activity elevated around dusk and during the period between midnight and dawn.
